# Supplementary material for: Laser desorption and ionization time-of-flightversus matrix-assisted laser desorption and ionization time-of-flight mass spectrometry of Pt(ii) and Ru(iii) metal complexes
Source: Royal Society of Chemistry journal article supplement (doi:10.1039/c0ay00517g), 2010-12-15
Supplement: c0ay00517g.pdf [file c0ay00517g.pdf]

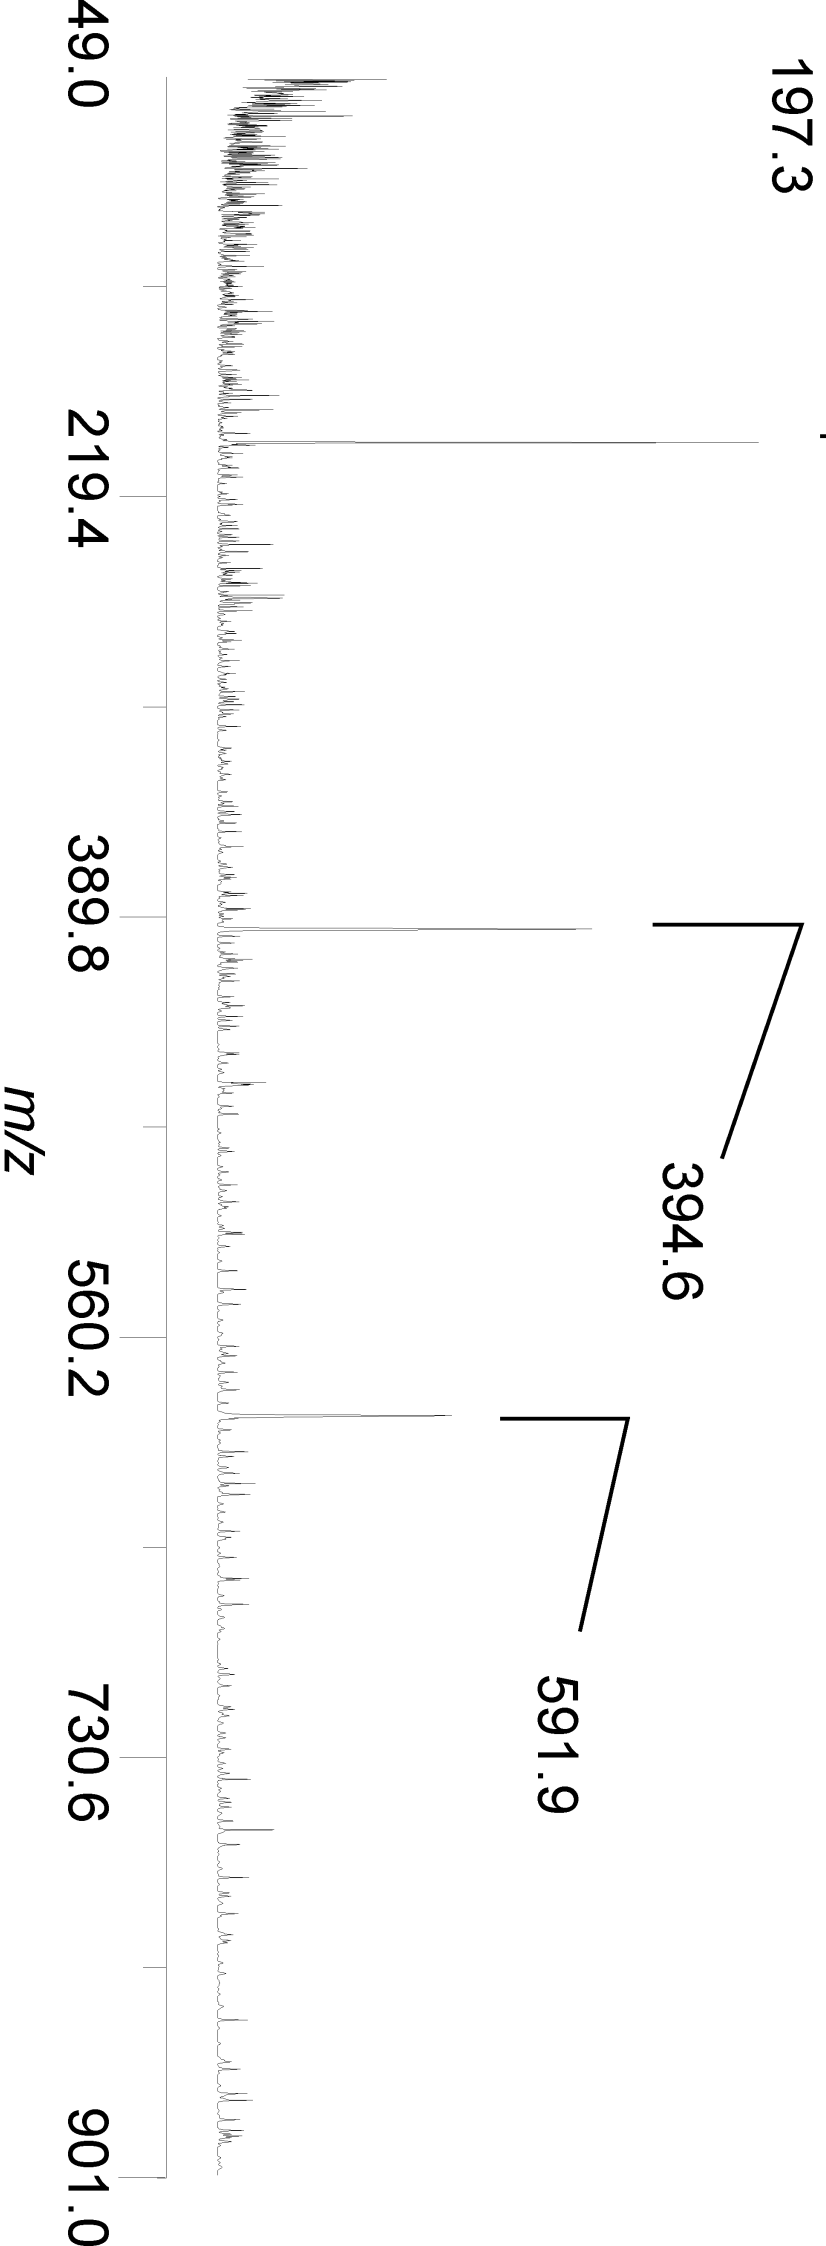

**Electronic supplementary information, fig. 1.**

LDI-TOF mass spectrum of the surface of golden MALDI-target.

Peaks are indicated by their m/z ratio, and they correspond to ion of gold (197.3), then dimer and trimer (clusters) of the metal (394.6 and 591.9, respectively).
